# Supplementary material for: Niche differentiation rather than biogeography shapes the diversity and composition of microbiome of Cycas panzhihuaensis
Source: Microbiome. 2019 Dec 2;7:152. doi: 10.1186/s40168-019-0770-y (PMC6888988; doi:10.1186/s40168-019-0770-y)
Supplement: Supplementary file 1 — Additional file 1. Proportion of total bacterial (A) and fungal (B) reads assigned to taxonomic ranks. [file 40168_2019_770_MOESM1_ESM.xlsx]

## Sheet: Additioal file 1
Additional file 1: Proportion of total bacterial (A) and fungal (B) reads assigned to taxonomic ranks.
