# Supplementary material for: Niche differentiation rather than biogeography shapes the diversity and composition of microbiome of Cycas panzhihuaensis
Source: Microbiome. 2019 Dec 2;7:152. doi: 10.1186/s40168-019-0770-y (PMC6888988; doi:10.1186/s40168-019-0770-y)
Supplement: Supplementary file 2 — Additional file 2. Core microbiomes in different compartments of C. panzhihuaensis revealed by 16S rRNA gene and ITS sequences, and their significant levels. [file 40168_2019_770_MOESM2_ESM.xlsx]

## Sheet: Additional file 2
Additional File 2: Core microbiomes in different compartments of C. panzhihuaensis revealed by 16S rRNA gene and ITS sequences, and their significant levels.
core bacterial microbiome	KM	Seed		Unfertilized seed		Ovule		Pollen		Root		Soil		ANOVA
		Reads	Relative abundance (%)	Reads	Relative abundance (%)	Reads	Relative abundance (%)	Reads	Relative abundance (%)	Reads	Relative abundance (%)	Reads	Relative abundance (%)	F (5,26)	P
	f__Caulobacteraceae	8129±5774.38	0.311986	1225.67±1037.18	0.0234643	172.50±113.24	0.00359789	193.50±98.35	0.00602152	122.75±59.86	0.00446396	61.50±13.38	0.00313172	0.844	0.531
	f__Enterobacteriaceae	6016±2971.73	0.23089	32076.67±16773.57	0.61408	46386.50±4432.20	0.967499	472.50±356.43	0.0147037	7.75±2.78	0.000281839	27.25±24.63	0.00138763	4.204	0.006
	f__Hyphomonadaceae	2152.67±166.85	0.082618	144.67±73.57	0.00276952	42.25±23.67	0.000881223	19.25±8.11	0.00059904	33±23.74	0.00120009	4.50±2.60	0.00022915	1.768	0.155
	f__Pseudomonadaceae	4085.67±2255.46	0.156805	1135.67±599.67	0.0217414	261.25±57.48	0.00544898	4103.25±1616.39	0.127689	70±13.67	0.00254564	91.75±49.17	0.00467212	22.606	0
	f__Sinobacteraceae	1183.67±326.34	0.0454284	126±72.46	0.00241216	34.50±26.28	0.000719578	31±14.29	0.000964688	2017.50±1600.79	0.073369	955.50±81.72	0.0486563	25.748	0
	f__Microbacteriaceae	417.33±204.67	0.016017	14737±14322.52	0.282127	0.50±0.50	1.04287e-05	1145.75±1032.11	0.0356545	5.75±4.46	0.000209106	95.25±35.39	0.00485035	2.356	0.068
	f__[Marinicellaceae]	0	0	256.67±126.47	0.00491366	30.50±19.59	0.000636149	19±19	0.00059126	6.75±3.12	0.000245472	21.25±21.25	0.0010821	7.462	0
	f__Moraxellaceae	1±1	3.83794e-05	2.67±1.20	5.1051e-05	114±112.67	0.00237774	1.25±1.25	3.88987e-05	0	0	0	0	1.534	0.214
	f__Propionibacteriaceae	0	0	112.67±67.27	0.00215691	94.50±93.50	0.00197102	85.75±83.75	0.00266845	9.50±3.77	0.00034548	8.50±6.38	0.00043284	1.14	0.365
	f__Comamonadaceae	476.67±177.84	0.0182942	171±110.39	0.00327365	62.25±56.36	0.00129837	10681.75±3710.01	0.332405	1251±1119.05	0.0454942	375.50±91.86	0.0191213	8.825	0
	f__Staphylococcaceae	71±44.51	0.00272493	18±18	0.000344594	0.25±0.25	5.21434e-06	6508±6501.33	0.202522	0.25±0.25	9.09157e-06	0	0	1.515	0.22
	f__Xanthomonadaceae	189±139.27	0.0072537	58.667±42.99	0.00112312	3.50±1.89	7.30007e-05	814.50±575.36	0.0253464	485.50±299.29	0.0176558	143.25±3.57	0.00729462	1.399	0.257
	f__Oxalobacteraceae	242.33±22.88	0.0093006	56±37.04	0.00107207	7.75±7.75	0.000161644	2453.25±1138.84	0.0763426	4.50±2.87	0.000163648	75.75±23.91	0.00385737	6.373	0.001
	f__Pseudonocardiaceae	28±14.57	0.00107462	3.33±2.85	6.38138e-05	3±3	6.2572e-05	258.75±245.80	0.00805203	14052±4394.12	0.511019	428.25±32.76	0.0218075	6.603	0
	f__Rhodospirillaceae	25.67±6.57	0.00098507	15±11.68	0.000287162	2.50±1.66	5.21434e-05	5.50±4.84	0.000171154	1466.75±815.26	0.0533402	1158.50±49.32	0.0589935	2.699	0.043
	f__Hyphomicrobiaceae	143.33±42.53	0.00550104	41.67±29.63	0.000797672	3.50±2.53	7.30007e-05	69.75±37.25	0.00217055	1411.75±800.74	0.0513401	1642±77.21	0.0836145	2.156	0.09
	f__Actinosynnemataceae	0	0	0	0	0	0	1.50±1.50	4.66784e-05	1142±653.50	0.0415303	49.25±3.82	0.00250792	1.707	0.168
	f__Bradyrhizobiaceae	9.67±5.49	0.000371001	8.67±4.48	0.000165916	0	0	24±16.95	0.000746855	959.50±513.52	0.0348934	331.75±30.51	0.0168935	1.136	0.367
	f__Thermomonosporaceae	0	0	0	0	0	0	0	0	1009.25±817.23	0.0367027	49±23.93	0.00249519	4.086	0.007
	f__Gaiellaceae	0.33±0.33	1.27931e-05	8±4.36	0.000153153	0	0	0.50±0.50	1.55595e-05	24.25±13.14	0.000881882	1553.25±135.95	0.0790951	0.753	0.592
	f__Micromonosporaceae	0	0	0	0	0	0	5.25±5.25	0.000163375	885±482.73	0.0321842	939.25±254.27	0.0478288	23.518	0
	f__Solirubrobacteraceae	0	0	3.33±3.33	6.38138e-05	0	0	3.75±3.75	0.000116696	14.25±8.53	0.00051822	695.25±77.69	0.0354038	29.374	0
	f__Syntrophobacteraceae	9±5.86	0.000345414	5.33±5.33	0.000102102	0	0	0	0	3.75±2.17	0.000136374	371.50±78.21	0.0189176	36.934	0
	PZH	Seed		Root		Soil		ANOVA
		Reads	Relative abundance (%)	Reads	Relative abundance (%)	Reads	Relative abundance (%)	F (5,26)	P
	f__Burkholderiaceae	10614.67±10596.67	0.323391	0.50±0.50	1.36505e-05	1±1	6.34035e-05	0.844	0.531
	f__Pseudomonadaceae	8583±5000.61	0.261493	173.50±64.27	0.00473672	121.33±83.52	0.00769296	4.204	0.006
	f__Enterobacteriaceae	2777.33±2022.49	0.0846155	146±123.57	0.00398594	256±161.30	0.0162313	1.768	0.155
	f__Microbacteriaceae	1315.67±1266.27	0.0400837	8.50±5.01	0.000232058	13.67±1.33	0.000866514	22.606	0
	f__Sphingomonadaceae	1607.33±1312.93	0.0489697	273.75±142.19	0.00747364	63.67±12.44	0.00403669	8.051	0
	f__Actinosynnemataceae	0	0	8005.50±3419.33	0.218558	102.67±43.17	0.00650943	2.356	0.068
	f__Rhodospirillaceae	17±5.86	0.00051793	5288.75±3045.54	0.144388	345.33±57.17	0.0218953	7.462	0
	f__Pseudonocardiaceae	10.33±1.20	0.00031482	5750.75±2539.96	0.157001	435.67±17.85	0.0276228	1.534	0.214
	f__Nocardiaceae	1.33±1.33	4.06219e-05	1735.25±1035.12	0.047374	2.33±0.88	0.000147941	1.14	0.365
	f__Comamonadaceae	684±127.03	0.020839	2338±1559.12	0.0638296	66.33±19.15	0.00420577	8.825	0
	f__Sinobacteraceae	427.33±201.50	0.0130193	1550.50±839.81	0.0423301	187±19.29	0.0118565	1.515	0.22
	f__Hyphomicrobiaceae	91±3.46	0.00277245	2315.25±1149.61	0.0632085	1009.33±151.25	0.0639953	1.399	0.257
	f__Bacillaceae	32.33±14.68	0.000985082	1145.50±1006.47	0.0312732	1962±672.74	0.124398	6.373	0.001
	f__Rhizobiaceae	295.33±252.40	0.00899776	755±511.56	0.0206122	32.33±2.67	0.00205005	6.603	0
	f__Conexibacteraceae	27±27	0.000822594	122±43.88	0.00333072	861±97.55	0.0545904	2.699	0.043
	f__Gaiellaceae	3.67±1.20	0.00011171	87.25±42.62	0.00238201	1577.33±513.73	0.100008	2.156	0.09
	f__Rubrobacteraceae	4.67±4.67	0.000142177	4±2.48	0.000109204	608±156.86	0.0385493	1.707	0.168
	f__Geodermatophilaceae	35.33±17.03	0.00107648	12.50±6.75	0.000341262	464.33±305.81	0.0294404	1.136	0.367
core fungal microbiome	KM	Seed		Unfertilized seed		Ovule		Pollen		Root		Soil		ANOVA
		Reads	Relative abundance (%)	Reads	Relative abundance (%)	Reads	Relative abundance (%)	Reads	Relative abundance (%)	Reads	Relative abundance (%)	Reads	Relative abundance (%)	F(5,16)	P
	f__Nectriaceae	7275±6773.81	0.343117	1594±793.03	0.0891582	11399±2955.32	0.450571	5480.75±2984.88	0.233998	14698.75±9167.63	0.833972	15347.5±2437.50	0.412459	1.90488	0.149599
	f__Schizophyllaceae	329.67±294.40	0.0155484	0	0	0	0	53±51.68	0.00226281	2±1.41	0.000113475	2.50±2.18	6.71867e-05	1.46188	0.256468
	f__Incertae sedis	2007±564.38	0.0946579	4141±2287.80	0.231621	534±114.89	0.0211076	1938.25±1045.81	0.0827525	280.50±224.29	0.0159149	548.50±276.64	0.0147408	5.27076	0.00475298
	f__Trichocomaceae	556.33±227.06	0.0262388	379.67±298.35	0.0212361	262.25±71.03	0.010366	963±357.08	0.0411148	6.25±3.88	0.00035461	210±72.19	0.00564368	4.10016	0.0137694
	f__Marasmiaceae	0	0	885.33±885.33	0.0495199	0	0	10.25±10.25	0.000437618	0	0	0	0	1.37412	0.285553
	f__Rhizopodaceae	0	0	617±571.13	0.034511	0	0	0	0	0	0	0	0	1.66206	0.200794
	f__Geminibasidiaceae	0	0	17.33±17.33	0.000969516	2100.50±2099.83	0.083027	142.75±138.78	0.00609463	9.50±9.50	0.000539007	1632.75±1267.47	0.0438796	0.74086	0.60404
	f__Bionectriaceae	24±24	0.00113193	0	0	720.25±511.39	0.0284695	151.25±151.25	0.00645754	0.75±0.75	4.25532e-05	864.50±717.62	0.0232332	0.944622	0.479181
	f__Mortierellaceae	61.67±61.67	0.00290844	276.33±217.65	0.0154563	1267.25±649.00	0.0500909	345.25±200.49	0.0147403	0.50±0.50	2.83688e-05	1607.25±773.10	0.0431943	2.30222	0.0933931
	f__Microascaceae	0	0	81.67±50.51	0.00456791	11±5.52	0.0004348	569.75±556.50	0.0243252	0	0	15.50±9.03	0.000416557	0.875507	0.519194
	f__Amphisphaeriaceae	208.33±195.46	0.00982581	79±79	0.00441876	15.75±13.12	0.000622554	542±384.98	0.0231404	0.75±0.75	4.25532e-05	23.25±19.46	0.000624836	1.77601	0.174808
	f__Apiosporaceae	0	0	0	0	5.50±4.27	0.0002174	0	0	303.75±303.75	0.017234	13.25±13.25	0.000356089	0.834046	0.544383
	f__Sebacinaceae	0	0	101.67±58.89	0.00568659	5.75±5.75	0.000227282	0.25±0.25	1.06736e-05	227±227	0.0128794	1403.50±1403.17	0.0377186	0.731906	0.609978
	f__Lasiosphaeriaceae	70.33±70.33	0.00331719	151±77.83	0.00844598	25.75±12.78	0.00101783	64±55.98	0.00273244	0.25±0.25	1.41844e-05	950.25±915.01	0.0255377	0.783518	0.57623
	PZH	Seed		Root		Soil		ANOVA
		Reads	Relative abundance (%)	Reads	Relative abundance (%)	Reads	Relative abundance (%)	F(2,7)	P
	f__Nectriaceae	2124.67±760.68	0.134238	83.25±33.26	0.00308693	13513.67±5068.70	0.338949	21.9425	0.000965556
	f__Glomerellaceae	665.33±382.79	0.0420361	8.25±5.89	0.000305912	0	0	1.6624	0.256601
	f__Incertae sedis	660.33±436.72	0.0417202	5317±2130.97	0.197156	754.67±519.45	0.0189285	1.87046	0.22346
	f__Trichocomaceae	515.33±265.41	0.032559	1074.25±697.90	0.0398335	691.67±345.37	0.0173483	0.371399	0.702588
	f__Geminibasidiaceae	0	0	0	0	5296±2218.48	0.132834	4.04427	0.0680107
	f__Mortierellaceae	57.67±28.85	0.00364341	151.25±144.61	0.00560839	2158.67±1509.29	0.0541435	2.9753	0.116099
	f__Lasiosphaeriaceae	258.33±102.25	0.0163216	0.50±0.50	1.85401e-05	1714±1713.00	0.0429904	0.861413	0.462959
	f__Sebacinaceae	21±12.12	0.00132679	0	0	1737.67±1727.18	0.043584	1.21573	0.352222
	f__Sordariaceae	17±17	0.00107407	0.75±0.75	2.78102e-05	884.67±882.67	0.0221892	1.20206	0.355818
			mean±standard error
